# Supplementary material for: MRI-only radiotherapy from an economic perspective: Can new techniques in prostate cancer treatment be cost saving?
Source: PubMed Central journal article supplement (PMC9720486; doi:10.1016/j.ctro.2022.11.012), 2022-11-22
Supplement: mmc1.pdf [file mmc1.pdf]

## Supplementary material 1

Inputs from regional price lists 2021 (EUR) used for cost assessment of pre-treatment workflow and late rectal bleeding. In columns 1-4, from the left, the following are presented: workflow task, original Swedish task explanation according to the price lists, price list code and price for the task. For comparison, a few examples of different times for the target delineation and the treatment planning tasks are given. In the presented work, the target delineation task was either 30 or 45 minutes and treatment planning was always set to 120 minutes. References to the regional price lists are given below the table.

| <b>Inputs</b>                          |                                                        |                               |              |
|----------------------------------------|--------------------------------------------------------|-------------------------------|--------------|
| Pre-treatment workflow cost assessment |                                                        |                               |              |
| <b>Task</b>                            | <b>Original swedish task explanation in price list</b> | <b>Price list code</b>        | <b>Price</b> |
| Physician visit                        | Läkarbesök, återbesök, onkolgi/strålningsfysik         | BLÄK01Å                       | 244          |
| Nurse visit                            | Besök, annan HS-personal                               | BSVB01                        | 88           |
| Physicist check                        | Fysikerkontroll per fall                               | FKNTR                         | 76           |
| Nurse check*                           | -                                                      | BSVB01/2                      | 44           |
| Ultrasound of the pelvis with biopsy   | Ultraljud lilla bäcknet med punktion/biopsi            | ULJ97050                      | 327          |
| MR-imaging prostate                    | MRT prostata                                           | M5700                         | 325          |
| CT-imaging lower abdomen               | DT nedre buk/bäcken, utan iv kontrast                  | DT85500                       | 136          |
| QC-measurement                         | QC-mätning/fall                                        | QCM                           | 411          |
| Target delineation, 30 minutes         | Definition av targetområde/fall, 30 minuter            | DV022A                        | 218          |
| Target delineation, 45 minutes         | Definition av targetområde/fall, 45 minuter            | DV022B                        | 292          |
| Target delineation, 60 minutes         | Definition av targetområde/fall, 60 minuter            | DV022C                        | 366          |
| Target delineation, 75 minutes         | Definition av targetområde/fall, 75 minuter            | DV022D                        | 440          |
| Treatment planning, 60 minutes         | Dosplan typ A, 60 min                                  | DV079A                        | 317          |
| Treatment planning, 120 minutes        | Dosplan typ B, 120 min                                 | DV079B                        | 562          |
| Treatment planning, 180 minutes        | Dosplan typ C, 180 min                                 | DV079C                        | 808          |
| Late rectal bleeding cost assessment   |                                                        |                               |              |
| <b>Workflow task</b>                   | <b>Original swedish explanation in price list</b>      | <b>Code in price list</b>     | <b>Price</b> |
| Physician visit (Urology department)   | Läkarbesök (Verksamhetsområde urologi)                 | BLÄK01                        | 233          |
| Proctoscopy                            | Rektoskopi                                             | UJG02                         | 247          |
| Physician visit, proctoscopy           | Läkarbesök, nybesök, kirurgi                           | BLÄK01N                       | 320          |
| Total cost late rectal bleeding        |                                                        | BLÄK01+UJG02+BLÄK01N+2*BLÄK01 | 1 265        |

\*Nurse check was estimated as half a nurse visit

References:

Regionala priser och ersättningar för Södra sjukvårdsregionen 2021

<https://sodrasjukvardsregionen.se/avtal-priser/regionala-priser-och-ersattningar/>

Bild- och funktionsmedicin, prislister 2021, Region Skåne

<https://vardgivare.skane.se/patientadministration/avgifter-och-prislister/prislister-bild-funktionsmedicin/>
